# Supplementary material for: Quantitative determination of leukocyte esterase with a paper-based device
Source: Royal Society of Chemistry journal article supplement (doi:10.1039/d0ra03306e), 2020-01-01
Supplement: d0ra03306e1.pdf [file d0ra03306e1.pdf]

# Supporting Information

## Quantitative Determination of Leukocyte Esterase with a Paper-Based Device

Mei-Lin Ho<sup>\*,a</sup>, Wei-Fang Liu<sup>a</sup>, Hsin-Yi Tseng<sup>a</sup>, Yu-Tzu Yeh<sup>a</sup>, Wei-Ting Tseng<sup>a</sup>, Yin-Yu Chou<sup>a</sup>, Xin-Ru Huang<sup>a</sup>, Hung-Cheng Hsu<sup>a</sup>, Li-Ing Ho<sup>b,c</sup> and Sheng-Wei Pan<sup>\*,b,c</sup>

<sup>a</sup>Department of Chemistry, Soochow University, No. 70, LinShih Rd., Shih-Lin, Taipei 11102, Taiwan. E-mail: meilin\_ho@gm.scu.edu.tw (M.-L. Ho)

<sup>b</sup>Department of Chest Medicine, Taipei Veterans General Hospital, Taipei 11217, Taiwan. E-mail: swpan25@gmail.com (S.-W. Pan)

<sup>c</sup>School of Medicine, National Yang-Ming University, Taipei 11221, Taiwan

### Supplementary materials:

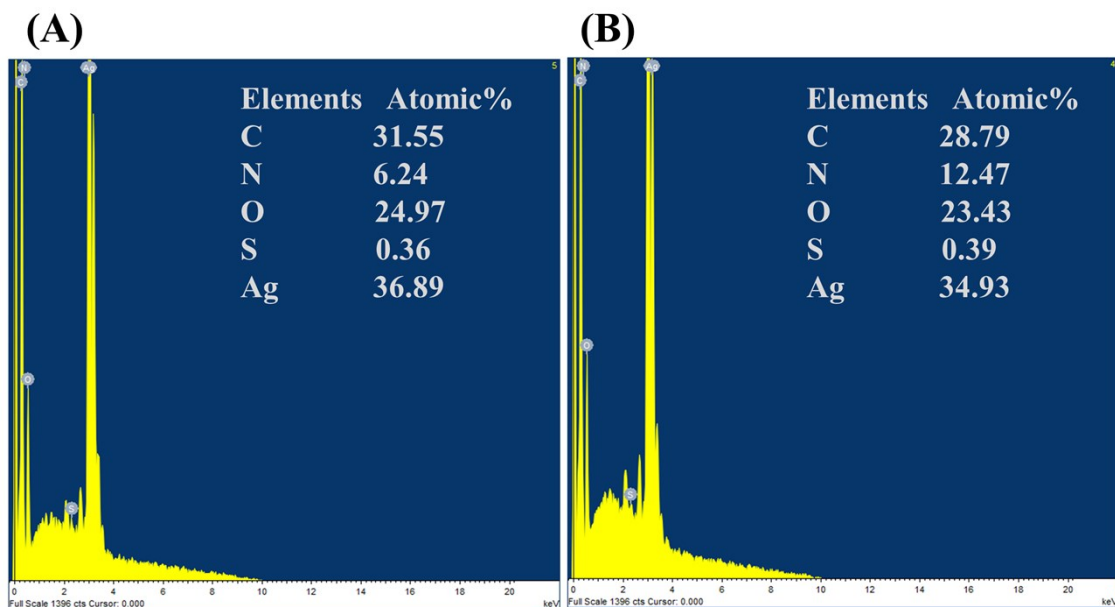

**Figure S1.** The EDS spectra of (A) PE/DAS/Ag film and (B) LE/PE/DAS/Ag film.

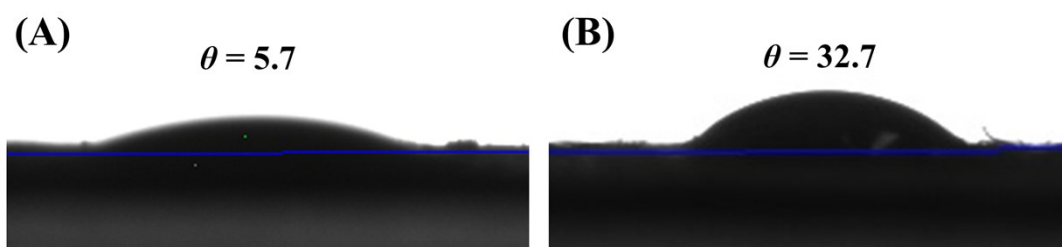

**Figure S2.** The contact angle of the (A) Ag ink surface; (B) Ag film surface.

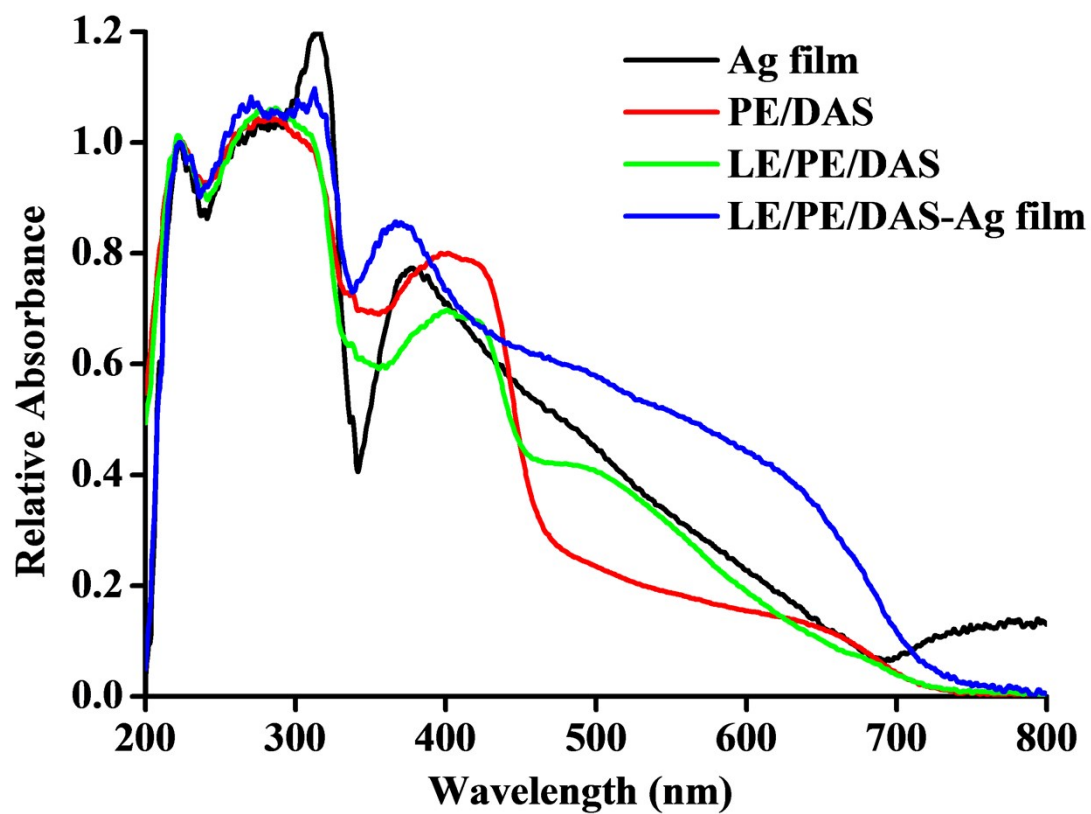

**Figure S3.** UV-Vis absorption spectra of the Ag film, PE/DAS, LE/PE/DAS and LE/PE/DAS/Ag film.

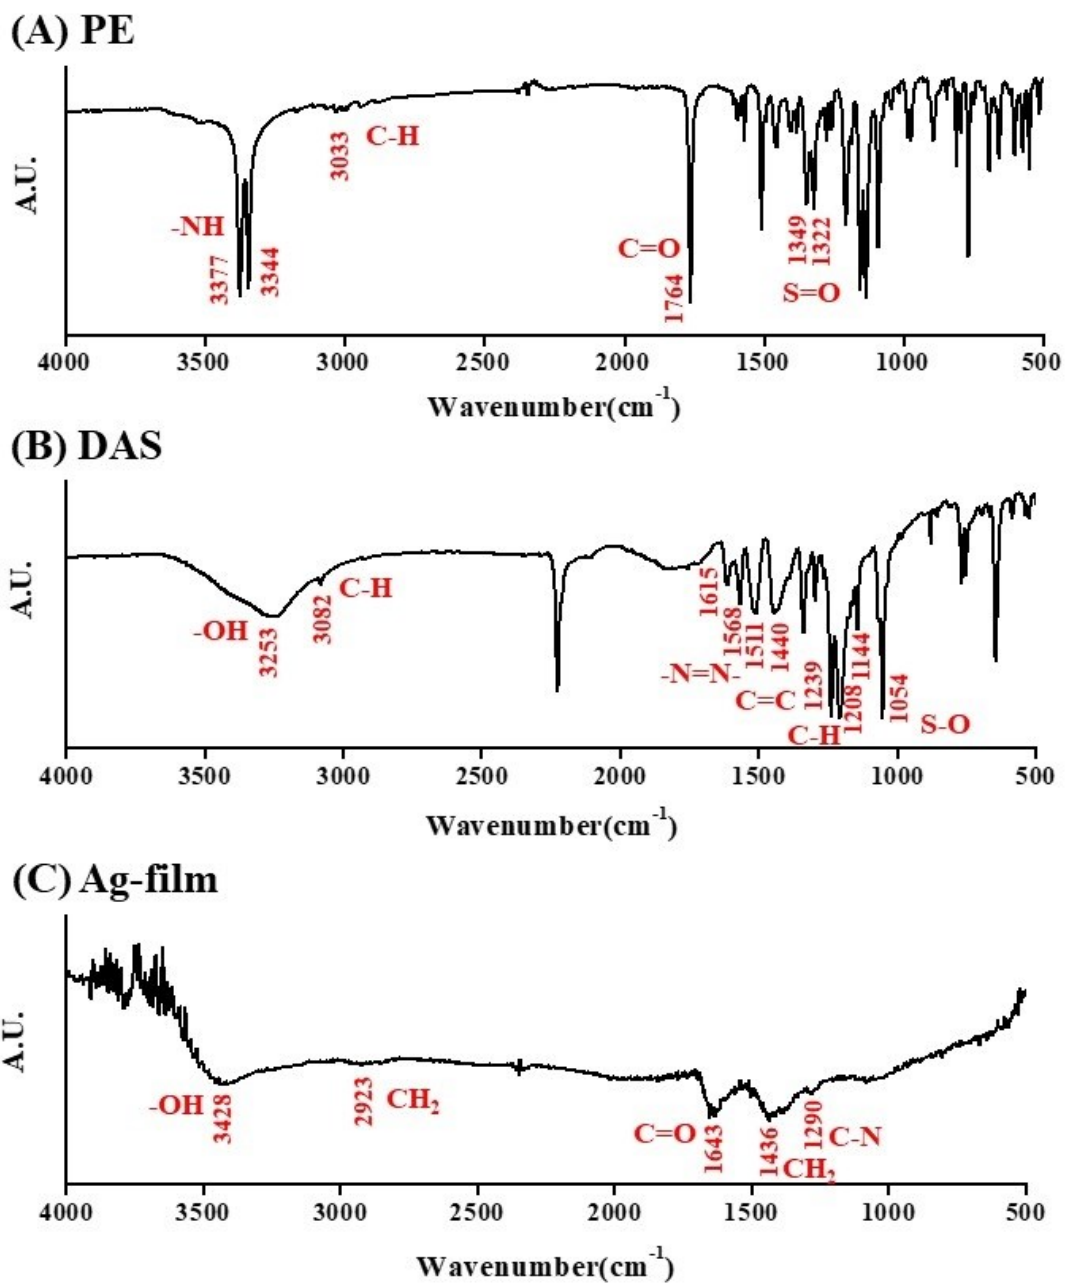

Figure S4. IR spectra of PE, DAS and Ag film.

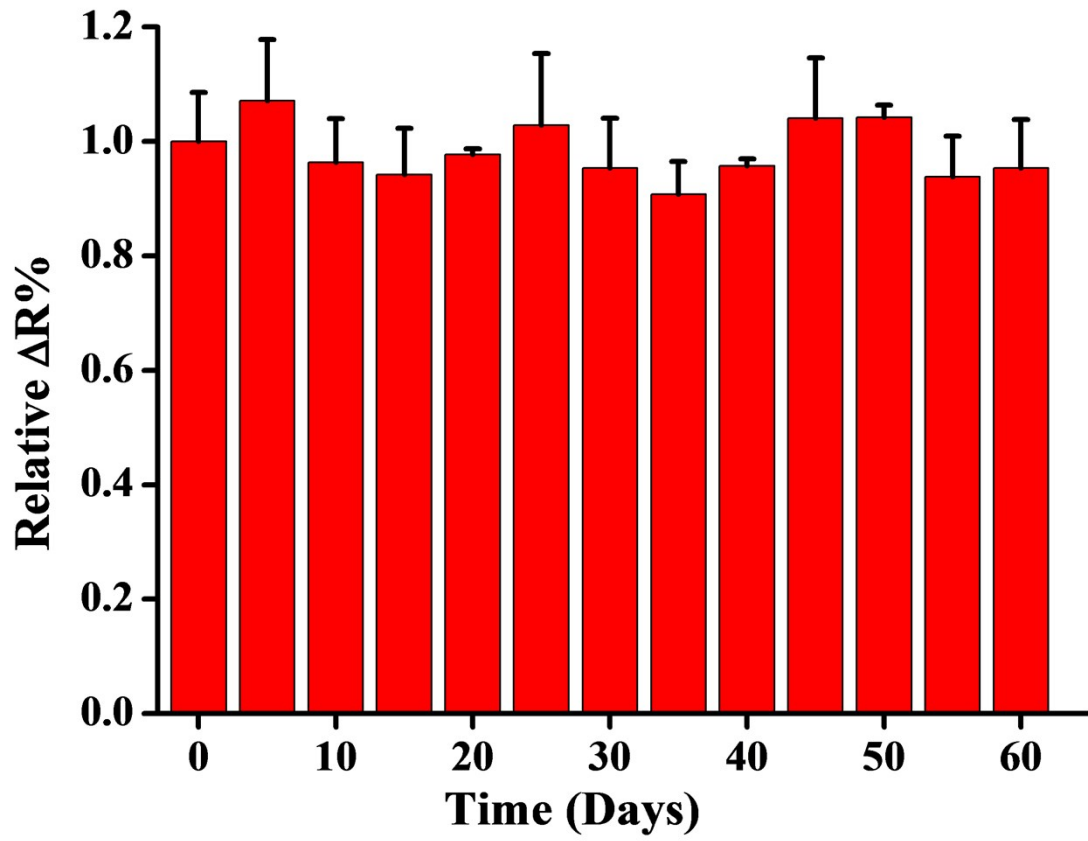

Figure S5. The storage test (N = 3).

**Table S1.** The potential interferent concentrations in human urine.

| Constituents    | Concentration                    |                        |
|-----------------|----------------------------------|------------------------|
|                 | Healthy individual               | The test in our method |
| Uric acid       | 2 mM <sup>1</sup>                |                        |
| Ascorbic acid   | 4.6 - 78.0 $\mu$ M <sup>2</sup>  |                        |
| Aspartic acid   | 10.9 mM <sup>2</sup>             |                        |
| Glutathion acid | 0.065 $\mu$ M <sup>3</sup>       |                        |
| Urea            | 12.285 mM <sup>2</sup>           |                        |
| KCl             | 1 mM <sup>2</sup>                | Each one is 10 mM      |
| Methionine      | 1 $\mu$ M <sup>4</sup>           |                        |
| Tryptophan      | 7.8 mM <sup>4</sup>              |                        |
| Valine          | 3.4 $\mu$ M <sup>4</sup>         |                        |
| Glycine         | 100 $\mu$ M <sup>2</sup>         |                        |
| Glucose         | 12.5 - 58.4 $\mu$ M <sup>2</sup> |                        |

**Table S2.** Interpretation of individual LE levels detected by LE-PADs and its association with clinical diagnosis of urinary tract infection (UTI).

| sample | LE-PAD level <sup>a</sup> | LE-PAD positive <sup>b</sup> | Clinical UTI diagnosis | leukocyte/high power field |
|--------|---------------------------|------------------------------|------------------------|----------------------------|
| 1      | 2.60                      | No                           | Yes                    | >100                       |
| 2      | 8.00                      | Yes                          | Yes                    | >100                       |
| 3      | 8.00                      | Yes                          | Yes                    | >100                       |
| 4      | 7.73                      | Yes                          | Yes                    | 50-99                      |
| 5      | 7.73                      | Yes                          | Yes                    | 50-99                      |
| 6      | 7.91                      | Yes                          | Yes                    | 50-99                      |
| 7      | 8.00                      | Yes                          | Yes                    | 20-29                      |
| 8      | 8.00                      | Yes                          | Yes                    | 20-29                      |
| 9      | 6.64                      | No                           | No                     | 6-9                        |
| 10     | 1.98                      | No                           | No                     | 6-9                        |
| 11     | 1.73                      | No                           | No                     | 6-9                        |
| 12     | 8.00                      | Yes                          | No                     | 6-10                       |
| 13     | 2.52                      | No                           | No                     | 6-10                       |
| 14     | 4.75                      | No                           | No                     | 3-5                        |
| 15     | 4.37                      | No                           | No                     | 0-5                        |
| 16     | 3.01                      | No                           | No                     | 0-5                        |
| 17     | 7.35                      | No                           | No                     | 0-5                        |
| 18     | 4.46                      | No                           | No                     | 0-5                        |
| 19     | 7.46                      | No                           | No                     | 0-5                        |
| 20     | 2.44                      | No                           | No                     | 0-2                        |
| 21     | 0.46                      | No                           | No                     | 0-2                        |

<sup>a</sup>(x 5.1 U mg<sup>-1</sup> mL<sup>-1</sup>)

<sup>b</sup>tested positive if the LE level > cut-off point of 7.60 (x 5.1 U mg<sup>-1</sup> mL<sup>-1</sup>)



**Table S3.** Statistical analysis of urine samples tested by LE-PADs device

| 1) Raw data   | UTI diagnosis | No UTI | Totals |
|---------------|---------------|--------|--------|
| Test Positive | 7             | 1      | 8      |
| Test Negative | 1             | 12     | 13     |
| Totals        | 8             | 13     | 21     |

| 2) Analysis result        | Point Estimate | Lower CI | Upper CI |
|---------------------------|----------------|----------|----------|
| Sensitivity               | 0.875          | 0.86767  | 0.88233  |
| Specificity               | 0.92308        | 0.91844  | 0.92771  |
| Positive Predictive Value | 0.875          | 0.86767  | 0.88233  |
| Negative Predictive Value | 0.92308        | 0.91844  | 0.92771  |
| 3) Diagnostic Value       | Point Estimate | Lower CI | Upper CI |
| Positive Likelihood Ratio | 11.375         | 10.70369 | 12.08842 |
| Negative Likelihood Ratio | 0.13542        | 0.12767  | 0.14363  |

UTI indicates urinary tract infection; CI, 95% confidence intervals (alpha=0.05).

#### References:

1. D. Lakshmi, M. J. Whitcombe, F. Davis, P. S. Sharma and B. B. Prasad, *Electroanalysis*, 2011, **23**, 305–320.
2. S. Bouatra, F. Aziat, R. Mandal, A. C. Guo, M. R. Wilson, C. Knox, T. C. Bjorndahl, R. Krishnamurthy, F. Saleem, P. Liu, Z. T. Dame, J. Poelzer, J. Huynh, F. S. Yallou, N. Psychogios, E. Dong, R. Bogumil, C. Roehring and D. S. Wishart, *PLoS One*, 2013, **8**, e73076-1–28.
3. M. Iida, T. Yasuhara, H. Mochizuki, H. Takakura, T. Yanagisawa and H. Kubo, *J. Inherit. Metab. Dis.*, 2005, **28**, 49–55.
4. K. Guo and L. Li, *Anal. Chem.*, 2009, **81**, 3919–3932.
